# Supplementary material
Source: PubMed Central journal article supplement (PMC3993035)
Supplement: Supp_Data.pdf [file Supp_Data.pdf]

## Supplementary Data

### Analysis of oxy-PAHs by Liquid Chromatography-Tandem Mass Spectrometry

9-fluorenone (FLO), 9,10-phenanthrenequinone (PQ), 9,10-anthraquinone (AQ), and benz[*a*]anthracene-7,12-dione (BAQ) were analyzed by liquid chromatography-tandem mass spectrometry (LC-MS/MS). LC-MS/MS analysis was performed using a Thermo Scientific TSQ Quantum Ultra Triple Quadrupole Mass Spectrometer (Thermo Fisher Scientific, Waltham, MA) with a Thermo Scientific Atmospheric Pressure Chemical Ionization (APCI) source, a Waters Acquity UPLC system (Waters Corporation, Milford, MA), and a Waters BEH C<sub>18</sub> UPLC Column (1.7  $\mu$ m, 2.1 mm  $\times$  50 mm). AQ and PQ standards were purchased from Sigma Aldrich (St. Louis, MO). FLO and BAQ standards were purchased from Acros Organics (Morris Plains, NJ).

The column temperature was maintained at 35°C, and the sample injection volume was 10  $\mu$ L. The mobile phase consisted of deionized water and LC-MS-grade methanol. The

mobile phase was started at a flow rate of 0.294 mL/min with 30% methanol for 2.07 min followed by a linear increase to 75% methanol over 2.72 min and was held at 75% methanol for 2.95 min. Then, at a flow rate of 0.5 mL/min, the mobile phase was linearly increased to 100% methanol over 0.45 min and held at 100% methanol for 3.81 min. Finally, at a flow rate of 0.294 mL/min, the mobile phase was linearly decreased to 30% methanol over 0.20 min and held at 30% methanol for 2.8 min.

AQ and BAQ were quantified in APCI negative ionization mode using the molecular ions  $m/z=208$  and  $m/z=258$ , respectively. PQ and FLO were quantified in APCI positive ionization mode using the precursor to fragment ion transition  $m/z=209 > 152$  and  $m/z=181 > 153$ , respectively. Quantification of each compound was performed according to the corresponding standard curve. The method detection limit is 6.88  $\mu$ g/L for FLO, 1.69  $\mu$ g/L for PQ, 21.2  $\mu$ g/L for AQ, and 3.87  $\mu$ g/L for BAQ.
