# Supplementary material
Source: PubMed Central journal article supplement (PMC3993035)
Supplement: Supp_Fig1.pdf [file Supp_Fig1.pdf]

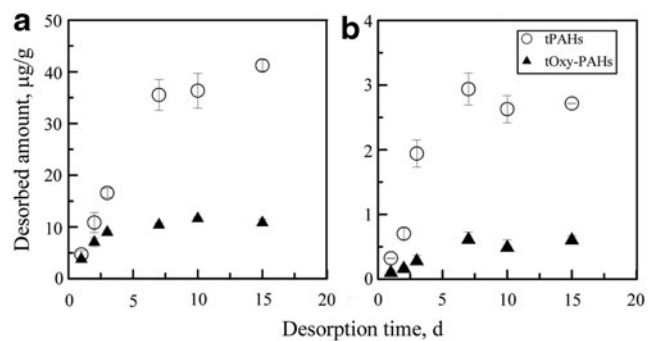

**SUPPLEMENTARY FIG. S1.** Desorption kinetics of total PAHs and total oxy-PAHs to HLB resin from (a) feed soil and (b) treated soil removed from the bioreactor 1 day after feeding, using the dialysis-tubing desorption method described in the text.
