# Supplementary material
Source: PubMed Central journal article supplement (PMC3993035)
Supplement: Supp_Fig2.pdf [file Supp_Fig2.pdf]

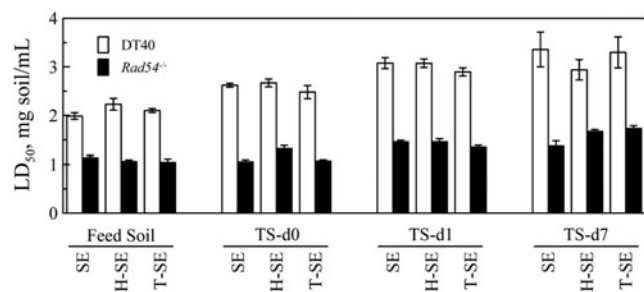

**SUPPLEMENTARY FIG. S2.** LD<sub>50</sub> of solvent extracts of soils before (SE) and after desorption to HLB (H-SE) or Tenax (T-SE) for parental DT40 cell line and its *Rad54*<sup>-/-</sup> mutant. TS-d0, TS-d1, and TS-d7 represent treated soil sampled immediately after feeding, 1 and 7 days after feeding during a 7-day treatment cycle, respectively. No significant differences ( $p > 0.05$ ) of LD<sub>50</sub> for DT40 or *Rad54*<sup>-/-</sup> were observed among the solvent extracts of each sample before or after desorption to HLB or to Tenax.
