# Supplementary material
Source: PubMed Central journal article supplement (PMC3993035)
Supplement: Supp_Fig3.pdf [file Supp_Fig3.pdf]

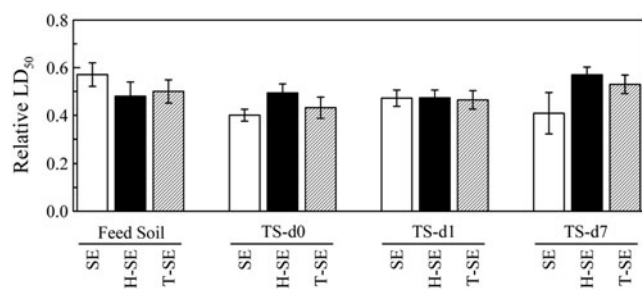

**SUPPLEMENTARY FIG. S3.** Relative LD<sub>50</sub> of solvent extracts of soils before and after desorption to HLB or Tenax. No significant differences ( $p > 0.05$ ) of relative LD<sub>50</sub> were observed among the solvent extracts of each sample before or after desorption to HLB or to Tenax.
