# Supplementary material
Source: PubMed Central journal article supplement (PMC3993035)
Supplement: Supp_Table1.pdf [file Supp_Table1.pdf]

SUPPLEMENTARY TABLE S1. CONCENTRATIONS OF POLYCYCLIC AROMATIC HYDROCARBONS  
AND OXYGENATED POLYCYCLIC AROMATIC HYDROCARBONS IN FEED SOIL AND TREATED SOILS

| <i>Compound</i>                               | <i>Feed soil, µg/g soil</i> | <i>TS-d0<sup>a</sup>, µg/g soil</i> | <i>TS-d1<sup>a</sup>, µg/g soil</i> | <i>TS-d7<sup>a</sup>, µg/g soil</i> |
|-----------------------------------------------|-----------------------------|-------------------------------------|-------------------------------------|-------------------------------------|
| Naphthalene (NAP)                             | 14.2±1.6                    | 15.4±0.2                            | 16.4±0.1                            | 17.9±0.0                            |
| Acenaphthene (ACE)                            | 7.5±0.8                     | 5.2±0.2                             | 3.7±0.2                             | 2.6±0.8                             |
| Fluorene (FLU)                                | 4.7±0.5                     | 1.4±0.0                             | 1.2±0.0                             | 1.1±0.0                             |
| Phenanthrene (PHN)                            | 84.9±11.2                   | 52.6±4.4                            | 39.8±0.1                            | 33.7±1.8                            |
| Anthracene (ANT)                              | 5.3±0.2                     | 3.0±0.1                             | 2.5±0.2                             | 2.2±0.1                             |
| Fluoranthene (FLA)                            | 27.0±10.6                   | 28.9±0.6                            | 21.6±4.0                            | 20.1±2.2                            |
| Pyrene (PYR)                                  | 65.6±6.4                    | 39.5±0.2                            | 30.2±0.9                            | 26.9±4.2                            |
| Benz[ <i>a</i> ]anthracene (BaA)              | 33.7±1.6                    | 7.7±0.1                             | 6.5±0.6                             | 6.2±0.0                             |
| Chrysene (CHR)                                | 40.4±6.4                    | 21.2±0.5                            | 19.4±2.4                            | 18.4±2.6                            |
| Benzo[ <i>b</i> ]fluoranthene (BbF)           | 12.6±0.8                    | 8.0±0.3                             | 7.3±1.0                             | 7.1±1.4                             |
| Benzo[ <i>k</i> ]fluoranthene (BkF)           | 7.2±0.4                     | 4.0±0.1                             | 3.6±0.4                             | 3.5±0.6                             |
| Benzo[ <i>a</i> ]pyrene (BaP)                 | 32.0±4.1                    | 20.4±0.2                            | 18.9±2.3                            | 18.8±3.6                            |
| Dibenzo[ <i>a,h</i> ]anthracene (DBA)         | 3.2±0.1                     | 0.7±0.0                             | 0.7±0.1                             | 0.6±0.1                             |
| Benzo[ <i>g,h,i</i> ]perylene (BgP)           | 23.3±4.2                    | 21.1±0.4                            | 20.3±0.1                            | 20.9±0.3                            |
| Total PAHs                                    | 361.7±23.0                  | 229.2±4.8                           | 191.9±12.6                          | 180.0±16.2                          |
| 9-Fluorenone (FLO)                            | 1.4±0.1                     | 1.1±0.0                             | 0.6±0.0                             | 0.6±0.1                             |
| 9,10-Phenanthrenequinone (PQ)                 | 0.9±0.1                     | 0.5±0.0                             | 0.3±0.1                             | 0.3±0.0                             |
| 9,10-Anthraquinone (AQ)                       | 18.3±0.4                    | 8.8±0.2                             | 6.1±0.7                             | 4.7±0.1                             |
| Benz[ <i>a</i> ]anthracene-7,12-quinone (BAQ) | 1.7±0.1                     | 1.0±0.0                             | 0.9±0.0                             | 0.8±0.0                             |
| Total oxy-PAHs                                | 22.3±0.5                    | 9.9±0.3                             | 7.0±0.7                             | 5.5±0.1                             |

Data are mean and standard deviations of triplicates.

<sup>a</sup>TS-d0, TS-d1, and TS-d7 represent treated soil sampled immediately after feeding, 1 and 7 days after feeding, respectively, during a 7-day treatment cycle in the bioreactor.
