# Supplementary material
Source: PubMed Central journal article supplement (PMC3993035)
Supplement: Supp_Table2.pdf [file Supp_Table2.pdf]

SUPPLEMENTARY TABLE S2. RECOVERY  
OF POLYCYCLIC AROMATIC HYDROCARBONS  
AND OXYGENATED POLYCYCLIC AROMATIC HYDROCARBONS  
FOR THE DIALYSIS-TUBING DESORPTION METHOD

| <i>Compound</i>                                | <i>Recovery (%)</i>    |                          |
|------------------------------------------------|------------------------|--------------------------|
|                                                | <i>HLB<sup>a</sup></i> | <i>Tenax<sup>a</sup></i> |
| Naphthalene (NAP)                              | 104.3 ± 2.1            | 109.1 ± 1.5              |
| Acenaphthene (ACE)                             | 88.7 ± 18.5            | 100.3 ± 3.0              |
| Fluorene (FLU)                                 | 82.7 ± 7.0             | 80.5 ± 11.2              |
| Phenanthrene (PHN)                             | 99.1 ± 2.6             | 111.8 ± 2.3              |
| Anthracene (ANT)                               | 92.8 ± 2.5             | 83.7 ± 6.4               |
| Fluoranthene (FLA)                             | 104.8 ± 0.8            | 102.4 ± 15.5             |
| Pyrene (PYR)                                   | 86.1 ± 8.7             | 84.9 ± 5.6               |
| Benz[ <i>a</i> ]anthracene (BaA)               | 98.7 ± 1.2             | 91.7 ± 11.5              |
| Chrysene (CHR)                                 | 92.2 ± 0.8             | 88.9 ± 9.1               |
| Benzo[ <i>b</i> ]fluoranthene (BbF)            | 80.3 ± 0.8             | 87.4 ± 11.5              |
| Benzo[ <i>k</i> ]fluoranthene (BkF)            | 84.8 ± 0.7             | 90.1 ± 6.0               |
| Benzo[ <i>a</i> ]pyrene (BaP)                  | 94.3 ± 0.7             | 85.0 ± 17.0              |
| Dibenz[ <i>a,h</i> ]anthracene (DBA)           | 106.2 ± 0.1            | 104.9 ± 2.4              |
| Benzo[ <i>g,h,i</i> ]perylene (BgP)            | 81.8 ± 3.1             | 93.0 ± 13.9              |
| Total PAHs                                     | 93.6 ± 1.1             | 95.7 ± 0.7               |
| 9-Fluorenone (FLO)                             | 81.8 ± 3.3             | 100.0 ± 12.5             |
| 9,10-Phenanthrenequinone (PQ)                  | 84.3 ± 12.9            | 80.3 ± 4.2               |
| 9,10-Anthraquinone (AQ)                        | 116.1 ± 5.4            | 103.9 ± 8.6              |
| Benzo[ <i>a</i> ]anthracene-7,12-quinone (BAQ) | 83.7 ± 1.2             | 86.1 ± 6.0               |
| Total oxy-PAHs                                 | 110.2 ± 5.2            | 101.4 ± 8.2              |

Data are mean and standard deviations ( $n=3$ ). Feed soil was used; desorption time was 7 days.

<sup>a</sup>Tenax beads or HLB resin were used as sorbents.
